# Supplementary material
Source: PubMed Central journal article supplement (PMC11112234)
Supplement: sj-pdf-1-jfm-10.1177_1098612X15599823.pdf [file sj-pdf-1-jfm-10.1177_1098612X15599823.pdf]

### **Supplementary material:**

**Table 1a:** List of ingredients contained in the new weight management food (NWMF).

Poultry meat meal, rice, maize gluten meal, cellulose, tomato pomace, beet pulp, flaxseed, coconut oil, digest, animal fat, minerals, L-lysine, DL-methionine, dehydrated carrots, L-carnitine, vitamins, taurine, trace elements and beta-carotene. Naturally preserved with mixed tocopherol and citric acid.

**Table 1b:** Average nutrient content in the new weight management food (NWMF).

| Criterion            | Dried ration |              |                 |
|----------------------|--------------|--------------|-----------------|
|                      | As fed       | Dry matter   | Per 100 kcal ME |
| Protein              | 37.8 %       | 40.0 %       | 11.2 g          |
| Fat                  | 12.1 %       | 12.8 %       | 3.6 g           |
| Carbohydrate (NFE)   | 29.2%        | 30.9 %       | 8.7 g           |
| Fiber (crude)        | 9.3 %        | 9.8 %        | 2.8 g           |
| Total dietary fiber  | 16.5 %       | 17.5 %       | 4.9 g           |
| Moisture             | 5.5 %        | -            | 1.6 g           |
| Calcium              | 0.96 %       | 1.02 %       | 285 mg          |
| Phosphorus           | 0.70 %       | 0.74 %       | 207 mg          |
| Sodium               | 0.31 %       | 0.33 %       | 92 mg           |
| Potassium            | 0.71 %       | 0.74 %       | 210 mg          |
| Magnesium            | 0.09 %       | 0.10 %       | 27 mg           |
| Omega-3 fatty acids  | 1.06 %       | 1.12 %       | 314 mg          |
| Omega-6 fatty acids  | 2.30 %       | 2.43 %       | 682 mg          |
| Taurine              | 2,375 mg/kg  | 2,513 mg/kg  | 70 mg           |
| L-carnitine          | 530 mg/kg    | 561 mg/kg    | 16 mg           |
| L-lysine             | 2.1 %        | 2.2 %        | 623 mg          |
| Vitamin A            | 10,211 IU/kg | 10,805 IU/kg | 303 IU          |
| Vitamin D            | 927 IU/kg    | 981 IU/kg    | 27 IU           |
| Vitamin E            | 600 mg/kg    | 635 mg/kg    | 18 mg           |
| Vitamin C            | 90 mg/kg     | 95 mg/kg     | 3 mg            |
| Beta-carotene        | 1.5 mg/kg    | 1.6 mg/kg    | 0.04 mg         |
| Metabolisable Energy |              |              |                 |
| Kcal/100g            | 337          | 357          |                 |
| KJ/100g              | 1,412        | 1,494        |                 |

NFE: nitrogen free extract, ME: metabolisable energy

**Table 2:** Participating countries and number of cats recruited

| <b>Country</b> | <b># of cats per country</b> |
|----------------|------------------------------|
| France         | 29                           |
| Netherlands    | 22                           |
| Spain          | 17                           |
| Italy          | 11                           |
| Germany        | 9                            |
| United Kingdom | 9                            |
| Czech Republic | 4                            |
| Malta          | 4                            |
| Serbia         | 4                            |
| Norway         | 3                            |
| Denmark        | 3                            |
| Belgium        | 2                            |
| Finland        | 2                            |
| Latvia         | 2                            |
| Lithuania      | 2                            |
| Poland         | 2                            |
| Portugal       | 2                            |
| Romania        | 2                            |
| Sweden         | 2                            |
| Greece         | 1                            |
| Total          | 132                          |

**Table 3:** Body fat index chart with descriptors for visual and palpation-based assessment of overweight or obese cats.<sup>1</sup>

| Variable        | BFI                                                                           |                                                                                                             |                                                                                                    |                                                                                                           |
|-----------------|-------------------------------------------------------------------------------|-------------------------------------------------------------------------------------------------------------|----------------------------------------------------------------------------------------------------|-----------------------------------------------------------------------------------------------------------|
|                 | 30                                                                            | 40                                                                                                          | 50                                                                                                 | 60                                                                                                        |
| Body fat        | 26-35                                                                         | 36-45                                                                                                       | 46-55                                                                                              | 56-65                                                                                                     |
| Face structures | Slight fat cover; defined bony structures                                     | Slight to moderate fat cover; defined to slight bony structures                                             | Moderate fat cover; slight to minimal bony structures                                              | Thick fat cover; minimal to no bony structures                                                            |
| Head and neck   | Clear distinction between head and shoulder; loose scruff; slight scruff fat  | Clear to slight distinction between head and shoulder; loose to snug scruff; slight to moderate scruff fat. | Minimal distinction between head and shoulder; loose to snug scruff; slight to moderate scruff fat | Poor to no distinction between head and shoulder; snug to tight scruff; moderate to very thick scruff fat |
| Sternum         | Defined, slightly prominent; easy to palpate; slight to moderate pectoral fat | Minimally prominent; palpable; moderate pectoral fat                                                        | Poorly defined to not prominent; difficult to palpate; moderate to thick pectoral fat              | Not prominent; very or extremely difficult to palpate; very or extremely thick pectoral fat               |
| Scapulae        | Defined, slightly prominent, easy or very easy to palpate                     | Slightly prominent; easy to palpate                                                                         | Minimally to not prominent; palpable                                                               | Not prominent; difficult to palpate                                                                       |
| Ribs            | Not prominent; easy to palpate                                                | Not prominent; palpable                                                                                     | Not prominent; difficult to palpate                                                                | Not prominent; extremely difficult or impossible to palpate                                               |

|                           |                                                                            |                                                                                       |                                                                                  |                                                                                                               |
|---------------------------|----------------------------------------------------------------------------|---------------------------------------------------------------------------------------|----------------------------------------------------------------------------------|---------------------------------------------------------------------------------------------------------------|
| Abdomen                   | Loose abdominal skin with minimal fat; easy to palpate abdominal contents  | Obvious skin fold with moderate fat; easy to palpate abdominal contents               | Heavy fat pad; difficult to palpate abdominal contents                           | Very heavy fat pad; indistinction from abdominal fat; impossible to palpate abdominal contents                |
| Tail base                 | Slightly to minimally prominent bony structure; palpable; slight fat cover | Slight to minimally prominent bony structures; palpable; slight to moderate fat cover | Poorly defined bony structure; difficult to palpate; moderate to thick fat cover | Bony structure not prominent; very or extremely difficult to palpate; very thick to extremely thick fat cover |
| Body shape<br>From behind | Clear to poor muscle definition under a thin to moderate layer of fat      | Poor muscle definition under a moderate layer of fat                                  | Rounded appearance; thick layer of fat                                           | Rounded to square appearance; thick layer of fat                                                              |
| From the side             | No abdominal tuck                                                          | Slight abdominal bulge                                                                | Moderate abdominal bulge                                                         | Severe abdominal bulge                                                                                        |
| From above                | Slight hourglass or lumbar waist                                           | Lumbar waist                                                                          | Broadened back                                                                   | Severely broadened back                                                                                       |

---

**Table 4:** Muscle condition score (MCS): using visual examination and palpation over the temporal bones, scapulae, ribs, lumbar vertebrae and pelvic bones.<sup>2, 3</sup>

| Score | Description                           |
|-------|---------------------------------------|
| 1     | No muscle wasting, normal muscle mass |
| 2     | Mild muscle wasting                   |
| 3     | Moderate muscle wasting               |
| 4     | Marked muscle wasting                 |

**Table 5:** Participating cat breeds and number of cats enrolled.

| <b>Breeds</b>        | <b># of cats per breed</b> |
|----------------------|----------------------------|
| British Shorthair    | 3                          |
| Burmese              | 2                          |
| Chartreux            | 2                          |
| Norwegian Forest Cat | 2                          |
| Persian              | 1                          |
| Siamese              | 1                          |
| Siberian             | 2                          |
| Unknown              | 2                          |
| Mixed                | 117                        |



**Table 6:** Weight loss characteristics in cats by week as measured for the cats that lost weight, maintained or gained weight. The number of cats at each time point is indicated in parenthesis. Data is presented as least squares means and standard error or mean and standard error (% weight loss).

|                               | Weeks of the study     |                                     |                                     |                                    |                                    |                                    |                                    |
|-------------------------------|------------------------|-------------------------------------|-------------------------------------|------------------------------------|------------------------------------|------------------------------------|------------------------------------|
|                               | 0                      | 4                                   | 8                                   | 12                                 | 16                                 | 20                                 | 24                                 |
| <b>Body weight (kg)</b>       |                        |                                     |                                     |                                    |                                    |                                    |                                    |
| Cats that lost weight         | 6.91 ± 0.17<br>(n=110) | 6.71 ± 0.17 <sup>a</sup><br>(n=108) | 6.60 ± 0.17 <sup>a</sup><br>(n=103) | 6.45 ± 0.17 <sup>a</sup><br>(n=86) | 6.38 ± 0.17 <sup>a</sup><br>(n=74) | 6.24 ± 0.17 <sup>a</sup><br>(n=56) | 6.11 ± 0.18 <sup>a</sup><br>(n=31) |
| Cats that maintained weight   | 5.77 ± 0.73<br>(n=6)   | 5.77 ± 0.73<br>(n=6)                | 5.77 ± 0.80<br>(n=6)                | 5.77 ± 0.80<br>(n=1)               |                                    |                                    |                                    |
| Cats that gained weight       | 6.23 ± 0.45<br>(n=16)  | 6.35 ± 0.45<br>(n=16)               | 6.38 ± 0.45<br>(n=14)               | 6.42 ± 0.45<br>(n=11)              | 6.42 ± 0.45<br>(n=8)               | 6.43 ± 0.45<br>(n=4)               | 6.35 ± 0.47<br>(n=4)               |
| <b>Percentage weight lost</b> |                        |                                     |                                     |                                    |                                    |                                    |                                    |
| Cats that lost weight         | 0<br>(n=110)           | -2.92 ± 0.58<br>(n=108)             | -4.19 ± 0.50<br>(n=103)             | -6.16 ± 0.67<br>(n=86)             | -7.56 ± 0.72<br>(n=74)             | -9.51 ± 1.16<br>(n=56)             | -10.99 ± 1.79<br>(n=31)            |
| Cats that maintained weight   | 0<br>(n=6)             | 0<br>(n=6)                          | 0<br>(n=1)                          | 0<br>(n=1)                         | (n=0)                              |                                    |                                    |
| Cats that gained weight       | 0<br>(n=16)            | 2.04 ± 0.96<br>(n=16)               | 2.58 ± 1.14<br>(n=14)               | 3.05 ± 1.28<br>(n=11)              | 3.18 ± 1.4<br>(n=8)                | 3.53 ± 1.28<br>(n=8)               | 2.65 ± 2.39<br>(n=4)               |
| <b>BCS</b>                    |                        |                                     |                                     |                                    |                                    |                                    |                                    |
| Cats that lost weight         | 4.44 ± 0.05<br>(n=109) | 4.39 ± 0.05<br>(n=105)              | 4.35 ± 0.05<br>(n=100)              | 4.18 ± 0.05 <sup>a</sup><br>(n=83) | 4.11 ± 0.06 <sup>a</sup><br>(n=70) | 4.05 ± 0.06 <sup>a</sup><br>(n=55) | 3.88 ± 0.07 <sup>a</sup><br>(n=31) |
| Cats that maintained weight   | 4.17 ± 0.22<br>(n=6)   | 4.17 ± 0.22<br>(n=6)                | 4.14 ± 0.36<br>(n=1)                | 4.14 ± 0.36<br>(n=1)               |                                    |                                    |                                    |
| Cats that gained weight       | 4.34 ± 0.13<br>(n=16)  | 4.34 ± 0.13<br>(n=16)               | 4.35 ± 0.14<br>(n=14)               | 4.35 ± 0.15<br>(n=10)              | 4.34 ± 0.15<br>(n=8)               | 4.34 ± 0.14<br>(n=8)               | 4.35 ± 0.18<br>(n=4)               |
| <b>BFI</b>                    |                        |                                     |                                     |                                    |                                    |                                    |                                    |



|                             |                         |                         |                                     |                                     |                                     |                                     |                                     |
|-----------------------------|-------------------------|-------------------------|-------------------------------------|-------------------------------------|-------------------------------------|-------------------------------------|-------------------------------------|
| Cats that lost weight       | 46.29 ± 1.05<br>(n=104) | 45.54 ± 1.06<br>(n=100) | 44.65 ± 1.06 <sup>a</sup><br>(n=94) | 42.48 ± 1.07 <sup>a</sup><br>(n=79) | 41.78 ± 1.08 <sup>a</sup><br>(n=68) | 40.55 ± 1.10 <sup>a</sup><br>(n=53) | 40.06 ± 1.18 <sup>a</sup><br>(n=29) |
| Cats that maintained weight | 35.00 ± 4.38<br>(n=6)   | 35.00 ± 4.38<br>(n=6)   | 35.21 ± 5.56<br>(n=1)               | 35.21 ± 5.56<br>(n=1)               |                                     |                                     |                                     |
| Cats that gained weight     | 45.32 ± 2.68<br>(n=16)  | 45.00 ± 2.68<br>(n=16)  | 45.00 ± 2.71<br>(n=14)              | 45.03 ± 2.77<br>(n=10)              | 44.93 ± 2.82<br>(n=8)               | 44.93 ± 2.82<br>(n=8)               | 44.87 ± 3.06<br>(n=4)               |
| <b>MCS</b>                  |                         |                         |                                     |                                     |                                     |                                     |                                     |
| Cats that lost weight       | 0.84 ± 0.09<br>(n=103)  | 0.83 ± 0.09<br>(n=100)  | 0.85 ± 0.09<br>(n=95)               | 0.81 ± 0.09<br>(n=80)               | 0.77 ± 0.09<br>(n=67)               | 0.80 ± 0.09<br>(n=54)               | 0.80 ± 0.1<br>(n=31)                |
| Cats that maintained weight | 0.67 ± 0.36<br>(n=6)    | 0.66 ± 0.37<br>(n=5)    | 0.63 ± 0.48<br>(n=1)                | 0.63 ± 0.48<br>(n=1)                |                                     |                                     |                                     |
| Cats that gained weight     | 0.93 ± 0.22<br>(n=16)   | 0.94 ± 0.22<br>(n=16)   | 1.00 ± 0.23<br>(n=15)               | 0.95 ± 0.23<br>(n=10)               | 0.95 ± 0.24<br>(n=8)                | 0.95 ± 0.24<br>(n=8)                | 0.95 ± 0.26<br>(n=4)                |

BCS: body condition score, BFI: body fat index, MCS: muscle condition score, LSM: least squares means, SE: standard error, n:

number of cats for each data point. <sup>a</sup> indicates values significantly different from baseline.

**Table 7:** Quality of life characteristics in cats by week as measured for the cats that lost weight or gained weight. The number of cats at each time point is indicated in parenthesis. Data is presented as least squares means and standard error.

|                                  | Weeks of the study                  |                                     |                                     |                                    |                                    |                                    |                                    |
|----------------------------------|-------------------------------------|-------------------------------------|-------------------------------------|------------------------------------|------------------------------------|------------------------------------|------------------------------------|
|                                  | 0                                   | 4                                   | 8                                   | 12                                 | 16                                 | 20                                 | 24                                 |
| <b>Energy (scores 0 - 10)</b>    |                                     |                                     |                                     |                                    |                                    |                                    |                                    |
| Cats that lost weight            | 4.84 ± 0.18 <sup>a</sup><br>(n=110) | 5.41 ± 0.18 <sup>a</sup><br>(n=105) | 5.72 ± 0.18 <sup>a</sup><br>(n=101) | 5.95 ± 0.19 <sup>a</sup><br>(n=86) | 6.00 ± 0.19 <sup>a</sup><br>(n=72) | 6.10 ± 0.20 <sup>a</sup><br>(n=56) | 6.18 ± 0.22 <sup>a</sup><br>(n=31) |
| Cats that maintained weight      | 6.00 ± 0.78<br>(n=6)                | 6.33 ± 0.78<br>(n=6)                |                                     |                                    |                                    |                                    |                                    |
| Cats that gained weight          | 4.8 ± 0.50<br>(n=15)                | 5.07 ± 0.5<br>(n=15)                | 5.14 ± 0.50<br>(n=13)               | 5.08 ± 0.52<br>(n=10)              | 4.96 ± 0.54<br>(n=8)               | 5.09 ± 0.54<br>(n=4)               | 5.16 ± 0.60<br>(n=4)               |
| <b>Happiness (scores 0 - 10)</b> |                                     |                                     |                                     |                                    |                                    |                                    |                                    |
| Cats that lost weight            | 7.10 ± 0.17<br>(n=110)              | 7.09 ± 0.16<br>(n=105)              | 7.21 ± 0.17<br>(n=101)              | 7.36 ± 0.17 <sup>a</sup><br>(n=86) | 7.42 ± 0.17 <sup>a</sup><br>(n=72) | 7.44 ± 0.18 <sup>a</sup><br>(n=56) | 7.36 ± 0.20<br>(n=31)              |
| Cats that maintained weight      | 7.00 ± 0.71<br>(n=6)                | 7.00 ± 0.70<br>(n=6)                |                                     |                                    |                                    |                                    |                                    |
| Cats that gained weight          | 6.53 ± 0.45<br>(n=15)               | 6.60 ± 0.45<br>(n=15)               | 7.21 ± 0.17<br>(n=13)               | 6.70 ± 0.47<br>(n=10)              | 6.75 ± 0.49<br>(n=8)               | 6.75 ± 0.49<br>(n=8)               | 6.68 ± 0.56<br>(n=4)               |
| <b>Appetite (scores 0 - 10)</b>  |                                     |                                     |                                     |                                    |                                    |                                    |                                    |
| Cats that lost weight            | 7.69 ± 0.19<br>(n=110)              | 7.77 ± 0.19<br>(n=105)              | 7.93 ± 0.19<br>(n=101)              | 7.95 ± 0.20<br>(n=86)              | 7.79 ± 0.20<br>(n=72)              | 7.68 ± 0.22<br>(n=56)              | 7.29 ± 0.26<br>(n=31)              |
| Cats that maintained weight      | 8.67 ± 0.80<br>(n=6)                | 8.67 ± 0.80<br>(n=6)                |                                     |                                    |                                    |                                    |                                    |
| Cats that gained weight          | 7.17 ± 0.51<br>(n=15)               | 7.23 ± 0.51<br>(n=15)               | 6.68 ± 0.53<br>(n=12)               | 6.79 ± 0.55<br>(n=10)              | 7.15 ± 0.58<br>(n=8)               | 7.23 ± 0.60<br>(n=7)               | 7.06 ± 0.71<br>(n=4)               |

|                                     |                        |                                   |                                    |                       |                       |                       |                       |
|-------------------------------------|------------------------|-----------------------------------|------------------------------------|-----------------------|-----------------------|-----------------------|-----------------------|
| <b>Begging (scores 0 - 10)</b>      |                        |                                   |                                    |                       |                       |                       |                       |
| Cats that lost weight               | 6.27 ± 0.30<br>(n=110) | 6.39 ± 0.30<br>(n=105)            | 6.40 ± 0.30<br>(n=101)             | 6.61 ± 0.31<br>(n=86) | 6.39 ± 0.31<br>(n=72) | 6.12 ± 0.32<br>(n=56) | 6.05 ± 0.36<br>(n=31) |
| Cats that maintained weight         | 6.00 ± 1.27<br>(n=6)   | 5.83 ± 1.27<br>(n=6)              |                                    |                       |                       |                       |                       |
| Cats that gained weight             | 4.97 ± 0.81<br>(n=15)  | 6.70 ± 0.81<br>(n=15)             | 6.35 ± 0.82<br>(n=13)              | 6.54 ± 0.84<br>(n=10) | 6.89 ± 0.87<br>(n=8)  | 6.54 ± 0.89<br>(n=7)  | 6.00 ± 0.98<br>(n=4)  |
| <b>Flatulence (scores 0 - 10)</b>   |                        |                                   |                                    |                       |                       |                       |                       |
| Cats that lost weight               | 0.65 ± 0.14<br>(n=110) | 0.60 ± 0.14<br>(n=105)            | 0.59 ± 0.14<br>(n=101)             | 0.53 ± 0.15<br>(n=86) | 0.46 ± 0.15<br>(n=72) | 0.46 ± 0.15<br>(n=56) | 0.43 ± 0.16<br>(n=31) |
| Cats that maintained weight         | 1.67 ± 0.61<br>(n=6)   | 3.33 ± 0.61<br>(n=6)              |                                    |                       |                       |                       |                       |
| Cats that gained weight             | 0.67 ± 0.39<br>(n=15)  | 0.67 ± 0.39<br>(n=14)             | 0.67 ± 0.39<br>(n=13)              | 0.68 ± 0.40<br>(n=10) | 0.67 ± 0.41<br>(n=8)  | 0.67 ± 0.41<br>(n=7)  | 0.66 ± 0.45<br>(n=4)  |
| <b>Stool volume (scores 0 - 10)</b> |                        |                                   |                                    |                       |                       |                       |                       |
| Cats that lost weight               | 5.10 ± 0.19<br>(n=101) | 4.99 ± 0.20<br>(n=97)             | 4.89 ± 0.20<br>(n=94)              | 4.96 ± 0.20<br>(n=80) | 4.98 ± 0.20<br>(n=66) | 4.99 ± 0.21<br>(n=52) | 4.91 ± 0.23<br>(n=29) |
| Cats that maintained weight         | 5.50 ± 0.80<br>(n=6)   | 5.17 ± 0.80 <sup>a</sup><br>(n=6) |                                    |                       |                       |                       |                       |
| Cats that gained weight             | 4.36 ± 0.53<br>(n=14)  | 4.71 ± 0.53<br>(n=14)             | 4.61 ± 0.53<br>(n=12)              | 4.73 ± 0.55<br>(n=9)  | 4.77 ± 0.57<br>(n=7)  | 4.80 ± 0.58<br>(n=6)  | 4.62 ± 0.62<br>(n=4)  |
| <b>Fecal score (1-5)</b>            |                        |                                   |                                    |                       |                       |                       |                       |
| Cats that lost weight               | 3.78 ± 0.10<br>(n=102) | 3.82 ± 0.10<br>(n=96)             | 3.92 ± 0.10 <sup>a</sup><br>(n=93) | 3.90 ± 0.11<br>(n=79) | 3.91 ± 0.11<br>(n=66) | 3.90 ± 0.11<br>(n=52) | 3.91 ± 0.12<br>(n=28) |
| Cats that maintained weight         | 4.15 ± 0.44<br>(n=5)   | 4.17 ± 0.43<br>(n=6)              |                                    |                       |                       |                       |                       |
| Cats that gained weight             | 3.87 ± 0.27<br>(n=15)  | 3.80 ± 0.27<br>(n=15)             | 3.94 ± 0.28<br>(n=13)              | 4.06 ± 0.28<br>(n=10) | 4.10 ± 0.29<br>(n=8)  | 4.20 ± 0.29<br>(n=7)  | 4.23 ± 0.31<br>(n=4)  |

<sup>a</sup> indicates values significantly different from baseline.



## References:

1. Witzel AL, Kirk CA, Henry GA, Toll PW, Brejda JJ and Paetau-Robinson I. Use of a morphometric method and body fat index system for estimation of body composition in overweight and obese cats. *Journal of the American Veterinary Medical Association*. 2014; 244: 1285-90.
2. Baldwin K, Bartges J, Buffington T, et al. AAHA nutritional assessment guidelines for dogs and cats. *Journal of the American Animal Hospital Association*. 2010; 46: 285-96.
3. Michel KE, Anderson W, Cupp C and Laflamme DP. Correlation of a feline muscle mass score with body composition determined by dual-energy X-ray absorptiometry. *The British journal of nutrition*. 2011; 106 Suppl 1: S57-9.
